## 1           **Modelling bacterial twitching in fluid flows: a CFD-DEM approach**

2  
3           Pahala Gedara Jayathilake<sup>1\*†</sup>, Bowen Li<sup>2</sup>, Paolo Zuliani<sup>2</sup>, Tom Curtis<sup>1</sup>, Jinju Chen<sup>1\*</sup>

4           <sup>1</sup>School of Engineering, Newcastle University, United Kingdom, NE17RU

5           <sup>2</sup>School of Computing, Newcastle University, United Kingdom, NE17RU

6  
7           \*Correspondence and requests for materials should be addressed to P.G.J (email:  
8           [pgjayathilake@gmail.com](mailto:pgjayathilake@gmail.com)) and J.C. (email: [jinju.chen@ncl.ac.uk](mailto:jinju.chen@ncl.ac.uk))

9  
10          Bacterial habitats are often associated with fluid flow environments. There is a lack of models  
11          of the twitching motility of bacteria in shear flows. In this work, a three-dimensional modelling  
12          approach of Computational Fluid Dynamics (CFD) coupled with the Discrete Element Method  
13          (DEM) is proposed to study bacterial twitching on flat and groove surfaces under shear flow  
14          conditions. Rod-shaped bacteria are modelled as groups of spherical particles and Type IV pili  
15          attached to bacteria are modelled as dynamic springs which can elongate, retract, attach and  
16          detach. The CFD-DEM model of rod-shape bacteria is validated against orbiting of immotile  
17          bacteria in shear flows. The effects of fluid flow rate and surface topography on twitching  
18          motility are studied. The model can successfully predict upstream twitching motility of rod-  
19          shaped bacteria in shear flows. Our model can predict that there would be an optimal range of  
20          wall shear stress in which bacterial upstream twitching is most efficient. The results also  
21          indicate that when bacteria twitch on groove surfaces, they are likely to accumulate around the  
22          downstream side of the groove walls.

23  
24          **Keywords:** Bacterial motility, upstream twitching, modelling, CFD-DEM

### 25 26          **Introduction**

27          A bacterial biofilm is a bacterial community attached into a surface through extracellular  
28          polymeric materials [1]. Prior to biofilm formation, bacteria may need to deposit on the surface  
29          from their planktonic state. After bacteria deposit on surfaces they may “*twitch*” or crawl over  
30          the surface using appendages called type IV pili (TFP) [2-5] to “explore” the substratum to find  
31          suitable sites for growth and thus biofilm formation. Pili emanate from bacterial surface and

---

† The author is currently affiliated with the Department of Oncology, University of Oxford, UK.

32 they can be up to several  $\mu\text{m}$  long (though they are nm in diameter<sup>6</sup>). Bacterial twitching  
33 occurs through cycles of polymerization and de-polymerization of type IV pili<sup>7,8</sup>.  
34 Polymerization causes the pilus to elongate and eventually attaching into surfaces. De-  
35 polymerization makes the pilus to retract and detaching from the surfaces. Pili retraction  
36 produces pulling forces on the bacterium, which will be pulled in the direction of the vector  
37 sum of the pili forces, resulting in a jerky movement (Figure 1). A typical TFP can produce a  
38 force exceeding 100 pN<sup>9</sup> and then a bundle of pili can produce pulling forces up to several nN  
39<sup>10</sup>. Bacteria may use pili not only for twitching but also for cell-cell interactions<sup>11,12</sup>, surface  
40 sensing<sup>13,14</sup> and DNA uptake<sup>15</sup>.

41 Twitching motility could depend on many factors including surface properties, pili  
42 arrangement on bacterial surface, and environmental conditions such as oxygen concentration  
43 and fluid flow rate<sup>16</sup>. For example, when pili emanate only at the poles of bacteria (e.g.,  
44 *Pseudomonas aeruginosa*), the bacteria will have persistent motion<sup>17,18</sup>. But, if pili are all  
45 around the cell body (e.g., *Neisseria gonorrhoeae*), the bacteria will have trapped or diffusive  
46 motion due to the *tug of war* mechanism<sup>19,20</sup>. If a pilus detaches while all the pili are in high  
47 tension and anti-parallel configuration, the bacterium will suddenly align along the resultant  
48 direction of the remaining bounded-pili causing a sudden change of the twitching direction.  
49 This is the so called *slingshot motion* and bacteria may use this mechanism to change crawling  
50 direction<sup>3,4</sup>. Bacterial twitching will depend on some physicochemical and structural properties  
51 of the surface. For instance, the pili attachment is enhanced<sup>2,18,21</sup> when the substratum is  
52 covered by extracellular polymeric materials. Patterned surfaces can be a barrier for bacterial  
53 twitching and hence hinder surface exploration by bacteria<sup>7,22</sup>. Chang, et al.<sup>22</sup> have shown that  
54 micro-scale surface topography (pillars) appears to be a barrier to the surface motility of  
55 *Pseudomonas aeruginosa* and it may hinder the ability of such cells to explore a surface.  
56 However, when the surface has micro-scale grooves, bacteria may display persistent twitching  
57 along grooves because cells can be guided by the groove walls<sup>2,23</sup>. Bacteria can also differently  
58 deploy pili<sup>17</sup> and change pili retraction speed<sup>24</sup> to adapt to nutrient availability. In fluid flow  
59 environments, rod-shaped bacteria tend to twitch against the flow because the fluid flow tends  
60 to align the bacteria along the flow direction while they are anchored to the tethering points,  
61 and then the fluid drag causes bacteria to flip around the anchoring point and twitch upstream  
62 (see Figure 1)<sup>25-27</sup>.

63 The experimental visualization of pili is difficult requiring great skill and specialised  
64 equipment<sup>28</sup>. Therefore, mathematical modelling of TFP mediated bacterial twitching is vital  
65 to understand the twitching mechanism under different environmental conditions. Researchers

66 have already modelled twitching motility of bacteria using a variety of mathematical models.  
67 For instance, Marathe, et al.<sup>20</sup> modelled *Neisseria gonorrhoeae* as point particles and used  
68 stochastic pili dynamics to simulate a *tug of war* mechanism with directional memory of  
69 twitching action. This work reported that directional memory enhances the surface exploration  
70 of bacteria. Molecular dynamics (MD) or discrete element based methods (DEM) have been  
71 widely used to understand bacterial twitching. Brill-Karniely, et al.<sup>4</sup> used a kinetic Monte Carlo  
72 algorithm together with MD to model TFP mediated twitching of *Pseudomonas aeruginosa*.  
73 This work reported that a minimal amount of angular rigidity of pili is needed to produce some  
74 experimentally observed behaviours of twitching bacteria. Furthermore, this work revealed that  
75 two TFP can produce the recently observed *slingshot motion*<sup>3</sup> when one pilus releases at a  
76 high-tension anti-parallel configuration of two pili. More MD based twitching models include  
77 de Haan<sup>6</sup>, Zaburdaev, et al.<sup>19</sup>, Ryota Morikawa<sup>29</sup>. However, these very interesting models have  
78 not considered interactions of a twitching bacterium and its hydrodynamic environment. This  
79 represents an important gap in our knowledge because the hydrodynamic environments can  
80 completely change twitching direction (e.g., upstream twitching) as well as influencing  
81 deposition and detachment<sup>30</sup>. In the present work, three-dimensional Computational Fluid  
82 Dynamics coupled with Discrete Element Method (CFD-DEM) is used to model rod-shaped  
83 bacterial twitching on flat and groove surfaces under various shear flow conditions. Various  
84 forms of CFD-DEM models have been employed to study bacterial deposition before<sup>31-33</sup>. The  
85 novelty of our model is the use of a three-way coupled (two-way coupled fluid-cell interactions  
86 plus cell-cell interactions) CFD-DEM model together with pili dynamics to study bacterial  
87 twitching on flat and groove surfaces with fluid flowing over the surfaces. The model is  
88 implemented on an open source CFD-DEM package called SediFoam<sup>34</sup>. The method is used  
89 to predict some experimentally observed behaviours of bacteria twitching in shear flows such  
90 as upstream twitching<sup>26</sup>. The model is generic in nature, but the parameters are chosen such  
91 that they are relevant to the *Pseudomonas aeruginosa*.

92

## 93 **Results and Discussion**

94

95 When immotile rod-shaped bacteria move in shear flows they will freely orbit in shear flows  
96<sup>30</sup> which is called “*Jeffery orbiting*”. We first compare the orbiting of a rod-shaped bacterium  
97 with theoretical results to validate the CFD-DEM model. Then, the model is used to study  
98 bacteria twitching on a rough surface in the presence of a static fluid medium. Finally, the

99 model is employed to investigate bacteria twitching in a flowing environment on a rough-flat  
100 and rough-groove surface.

101 The computational domain for the following simulations is a rectangular box having the  
102 dimensions of  $[0, 50] \times [0, 20] \times [0, 20] \mu\text{m}^3$ . Periodic velocity boundary conditions in two  
103 horizontal directions ( $x$  and  $y$  direction) and no-slip and fixed-velocity boundary conditions are  
104 applied respectively at the bottom and top walls ( $z$  direction). Pressure is periodic in the  
105 horizontal directions and zero gradient boundary conditions are applied at the top and bottom  
106 walls. The parameters used for the following simulations are listed in Table S1. A single  
107 bacterium is simulated unless specified otherwise and the bacterium is initially oriented in the  
108 flow direction.

109

### 110 **Model validation for *Jeffery Orbiting***

111 SediFoam has been extensively validated for spherical particle laden flows [34-36](#). We use  
112 SediFoam for rod-shaped objects in this work and hence we validate the model for *Jeffery orbit*  
113 before using for bacterial twitching. The analytical expression for orbiting angular velocity ( $\dot{\theta}$ )  
114 and period ( $T$ ) of a rod-shaped bacterium having an aspect ratio of  $a$  in a shear rate of  $\dot{\gamma}$  are  
115 given by [Jeffery](#) <sup>37</sup> as

$$116 \quad \dot{\theta} = \frac{\dot{\gamma}}{(1+a^2)} (a^2 \cos^2 \theta + \sin^2 \theta) \quad (1)$$

$$117 \quad T = \frac{2\pi}{\dot{\gamma}} \left( a + \frac{1}{a} \right) \quad (2)$$

118 The CFD-DEM model is validated for the *Jeffery orbit* at different shear rates and aspect ratio  
119 of the cell body. The analytical solution for the orbiting angular velocity and the period of the  
120 orbit are compared with the present numerical results. Figure S1 (a) shows the numerical and  
121 analytical results at  $a = 3$  and  $\dot{\gamma} = 1000 \text{ s}^{-1}$  and it can be seen that the present CFD-DEM model  
122 can predict the orbit transit of a rod-shaped bacterium in shear flows accurately. Figure S1 (b)  
123 compares the periods at different aspect ratios and shear rates and it is evident that the model  
124 is capable of predicting the theoretical results. The relative error of the maximum and minimum  
125 angular velocities are presented in Figure S1 (c) and it can be seen that the relative error is less  
126 than 15% for all the cases we have considered here. A relative error as large as 15% would be  
127 because the analytical solution is valid only for inertialess rods, the present CFD-DEM model  
128 computes only average hydrodynamics around the bacterium, and the shape of the bacterium  
129 is not precisely a rod. Therefore, a relative error of 15% would be still acceptable for  
130 reasonable predictions of rod-shaped bacteria interaction with fluid flows.

131

## 132 **Bacterial twitching in static fluid**

133 Bacterial motility would be affected by the number of pili and how those pili distribute at the  
134 bacteria poles<sup>2,17</sup>. Therefore, the present model is employed to understand how the number of  
135 pili and the distribution angle ( $\alpha$ ) influence twitching characteristics. Bacterial twitching is  
136 usually characterised by the Mean Square Displacement (MSD) which can explain the  
137 twitching behaviour (diffusive, trapped, and persistent) based on the MSD power (MSD =  
138  $Kt^n$ , where  $n$  is the MSD power,  $K$  is a constant, and  $t$  is time)<sup>4,20</sup>. Figure 2 shows the MSD  
139 power for different pili distribution angles and pili numbers. As the pili angle increases the  
140 MSD power decreases because the cell is more likely to trap between pili which are in force  
141 equilibrium. The numbers shown in bars are the  $R^2$  value of the regression to compute MSD  
142 power and it can be seen that it decreases as the pili distribution angle increases, because the  
143 cell has more irregular motion in that case. When the number of pili increases at the same pili  
144 angle the MSD power does not change much. The trajectory of the leading and trailing poles  
145 are shown in Figure 2(b) when the pili number is 2 and the pili distribution angle is  $30^\circ$ . The  
146 trailing pole moves above the leading pole because of the inclination of the bacterium to the  
147 surface, as observed experimentally by others<sup>17</sup>.

148 Figure 3 shows the variation of twitching velocity ( $V_t$ ) for different pili distribution angles and  
149 pili numbers. As expected, the quasi-stationary time (time spent at  $V_t < 0.01 \mu\text{m/s}$ ) decreases  
150 and moving time (time spent at  $V_t > 0.01 \mu\text{m/s}$ ) increases when the number of pili increases,  
151 since the bacterium is pulled by pili more frequently. The pili distribution angle has significant  
152 influence on the intermediate velocity ( $0.01 < V_t < 0.8 \mu\text{m/s}$ ). The average twitching velocity is  
153 less than  $0.8 \mu\text{m/s}$  for all the cases (Figure 3b) which is a realistic prediction for the twitching  
154 velocity of *Pseudomonas aeruginosa* (i.e.  $0.3 \mu\text{m/s}$ ) found in Maier and Wong<sup>2</sup>, Jin, et al.<sup>3</sup>. The  
155 average twitching velocity is more sensitive to the number of pili than the pili distribution  
156 angle. These results indicate that the MSD of bacteria can be simply written as MSD =  
157  $K(N_p)t^{n(\alpha)}$  because the MSD power and the twitching velocity are more sensitive to the pili  
158 distribution angle and the numbers of pili, respectively. Here,  $n(\alpha)$  is the MSD power and it  
159 explains the nature of the twitching motility, which is sub-diffusive (trapped) when  $n(\alpha) < 1$   
160 and super-diffusive (persistent) when  $1 < n(\alpha) < 2$ , diffusive when  $n(\alpha) = 1$  and ballistic  
161 when  $n(\alpha) = 2$ . In the present study, it can be seen that the twitching motility is super-diffusive  
162 most of the time (Figure 2a) and it never has a sub-diffusive motion. This is expected because  
163 all the pili are focused at one pole and their distribution angle is also taken from the Normal  
164 distribution and hence bacteria have persistent motion. There is experimental evidence that

165 *Pseudomonas aeruginosa* would twitch with a MSD power of  $1.55 \pm 0.34$  when they twitch  
166 using unipolar TFP <sup>17</sup>.

167 Figure 4 shows the tilt angle for different pili distribution angles and pili numbers. With  
168 increasing number of pili the tilt angle distributes in a wide range, while the average tilt angle  
169 is still around 5 to 10 degrees. The twitching experimental data of *Pseudomonas aeruginosa*  
170 reported in Ni, et al. <sup>17,38</sup> indicated that the average tilt angle would be around 15 degrees and  
171 our results are in a reasonable range considering the assumptions of the model. Our results  
172 show that as the pili distribution angle and numbers of pili increase there is a tendency for the  
173 bacterium to trap in a vertically-oriented configuration (Figure 4c-d). This is rather similar to  
174 the vertically-oriented upright walking of *Pseudomonas aeruginosa* <sup>17,38,39</sup>. The model shows  
175 that when a cell is trapped between pili for an extended period of time, the cell has more time  
176 to rotate around its body and reach a vertical orientation. However, our model is not capable  
177 of capturing the upright walking motility of bacteria. In the present model, vertically oriented  
178 bacteria remain trapped and then gradually move to the horizontally-oriented configuration and  
179 crawl when the trapped-configuration of pili is changed once a new pilus attaches or breaks,  
180 and the force becomes unbalanced. It appears that a special pili dynamics mechanism will be  
181 needed to capture those vertically-oriented upright walking bacteria and that is out of the scope  
182 of this paper.

183

### 184 **Bacterial twitching in flowing fluid**

185 We study bacterial twitching under a range of flow velocity (0-4 mm/s) which corresponds to  
186 a range of wall shear stress values (wall shear stress =  $\mu \frac{du}{dy}$ ,  $\frac{du}{dy}$  is the shear rate at the wall). We  
187 study a bacterium having two pili with  $30^\circ$  distribution angle and with increased pili elongation  
188 velocity (10 times) for the following reasons. When we add many pili a smaller time step is  
189 needed for scaling up ( $\ll 0.1$  s) to maintain numerical stability which has a significant  
190 computational cost when flow fields are taken into account. Even if we use two pili for the  
191 model, it does not necessarily mean that the bacterium has only two pili. Because of increased  
192 elongation velocity these two pili can mimic several pili in a real system because a new pilus  
193 is created faster after the breakage of an existing pilus. Figure S2 shows the main events  
194 associated with bacterial twitching in a flow environment, which are upstream twitching,  
195 detachment, orbiting in shear flow and re-attachment.

196 Figure 5 shows the probability of direction of motion of the cell at different wall shear stresses.  
197 If the fluid is static (Figure 5a), the cell can twitch in any direction on the surface because there



198 is no preferential driving force, and therefore the probability of twitching direction being in  
199 each angular bin is about  $1/12=0.08$ . Then, when the fluid flows, the cell tends to twitch  
200 upstream as seen in Figure 5(b-d) indicating the increased probability of bins from  $90^0$  to  $270^0$   
201 compared to the no-flow scenario. For the selected wall stresses, the maximum upstream  
202 twitching probability occurs at around 0.1 Pa and that probability decreases as the wall stress  
203 is either increased or decreased from that value, indicating that there would be an optimal flow  
204 condition for bacterial upstream twitching. Figure 6(a) supports this finding and shows a  
205 sinusoidal variation of twitching probability with wall shear stress. The probability of upstream  
206 twitching decreases and reaches a minimum and then increases to a maximum and then it  
207 decreases again. The reason for this behaviour is that the cell is initially headed in the flow  
208 direction and at low shear stresses the bacterial cell is not subjected to sufficient shear forces  
209 to rotate it in the upstream direction. Therefore, the cell will actively twitch and be passively  
210 advected in the flow direction. But, at moderate shear stress, the cell will be rotated and faced  
211 in the upstream direction and it will then twitch against the flow. As the fluid flow further  
212 increases, the fluid drag forces would tend to dominate over to the pili-based pulling forces and  
213 hence upstream twitching decreases again. Figure 6(b) shows the time average velocity in  
214 upstream and downstream directions. Upstream twitching velocity is fairly constant for a range  
215 of shear stress, in agreement with experimental findings in the literature <sup>26</sup>. It can be seen that  
216 the upstream twitching distance has a unimodal distribution (Figure 6c) with wall shear stress.  
217 The fluid flow conditions, apart from the optimal wall shear stress (that is around 0.1 Pa), may  
218 adversely influence upstream twitching. Shen, et al. <sup>26</sup> showed that upstream twitching of *P.*  
219 *aeruginosa* would be most efficient when the wall shear stress is around 0.5 Pa, and our model  
220 predictions are also in the same order. It can be seen in Figure 6(d) that bacteria detach from  
221 the wall more frequently when the wall shear stress is more than the optimal stress. This is  
222 because the fluid drag is dominant to the pili-based pulling when the stress is far beyond the  
223 optimal value.

224

### 225 **Bacterial twitching on a groove surface with fluid flow**

226 It is important to study how imposed fluid flows would influence bacterial twitching on  
227 structured surfaces because twitching would be influenced by both structures and moving fluid  
228 in this case. Therefore, we study bacterial twitching on a groove surface (Figure S3) when fluid  
229 flows across the grooves. The cross section of each groove wall (protrusion) is in the order of  
230 bacterial size and it is chosen as  $6 \times 5 \mu\text{m}^2$  (wide  $\times$  height). Bacterial upstream twitching is  
231 investigated at two different groove widths (19 and 46  $\mu\text{m}$ , which are about two and four times

232 of the bacterial length, cell body plus pili length) at a wall shear stress of 0.15 Pa. A similar  
233 geometry has been experimentally investigated for *Escherichia coli* deposition in Gu, et al.<sup>40</sup>.  
234 The pili dynamics is similar to the previous case of bacterial twitching on flat surface under  
235 shear flows (i.e., two pili with distribution angle of 30<sup>0</sup>). Four bacteria are randomly seeded on  
236 the surface. Figure S3 shows bacterial twitching on flat and groove surfaces. As expected,  
237 bacteria are trapped and twitch along the grooves for the non-flat surfaces.  
238 Figure 7 shows the probability of twitching direction at different surface conditions. As also  
239 shown in Figures 5-6, it can be seen that bacteria simply twitch upstream on the flat surface  
240 (Figure 7a). Figures 7 (b, c) indicate that the groove width has a vital influence on twitching  
241 motility. Upstream twitching is inefficient for the narrow groove (Figure 7c) and the direction  
242 of motility is chaotic in that case. The reason is that bacteria frequently collide on the groove  
243 wall because of fluid drag and upstream twitching resulting in the direction of motility change  
244 regularly. The groove walls also guide bacteria to twitch along the grooves. These constraints  
245 would give bacteria uniform chances to move in any direction on the groove when the groove  
246 width is relatively low. Figures S3 and 8 indicate that bacteria tend to accumulate downstream  
247 of the groove walls. This phenomenon would be theoretically meaningful because the fluid  
248 drag behind the walls would be weak and therefore bacteria would not be easily pulled along  
249 the flow. Therefore, bacteria that twitch upstream and reach the walls are likely to reside there  
250 for an extended period.

251

## 252 **Conclusion**

253 Bacterial motility shows interesting phenomena when active motility (swimming, twitching  
254 and so on) interferes with a surrounding fluid<sup>26,30,41</sup>. Upstream twitching is a mechanism used  
255 by rod-shaped bacteria such as *Pseudomonas aeruginosa* to colonize upstream sites of flow  
256 environments such as catheters. In this work, a CFD-DEM model is used to study bacterial  
257 twitching in fluid flows. The model can predict super diffusive motility in static fluid, upstream  
258 twitching in fluid flows, and flow-induced cell detachment/re-attachment to the surface. In  
259 agreement with experimental findings of Shen, et al.<sup>26</sup>, our model can predict that there would  
260 be an optimal range of wall shear stress in which bacterial upstream twitching is most efficient.  
261 When bacteria twitch on a groove surface, the resultant effect of fluid flow and surface  
262 topography would decide the nature of twitching and spatial segregation of bacteria on the  
263 surface. While our model can predict general characteristics of bacterial twitching, the model



264 should be carefully validated against experimental data before it can be used to gain more  
265 detailed insights about bacterial twitching in fluid flows.

266 Even though our model was basically used to study upstream twitching, it can give some  
267 insights for variety of other twitching phenomena. The present model can be used to investigate  
268 bacterial twitching on compliant surfaces and other surfaces with complex micro or nano scale  
269 structures. The model can be a robust tool to study twitching motility of different shapes of  
270 bacteria (e.g., *Neisseria gonorrhoeae* and *Synechocystis sp PCC 6803*)<sup>2</sup> and TFP-based  
271 colonization of curved shape bacterium *Caulobacter crescentus* in fluid flows<sup>42</sup>. Moreover,  
272 our model could be used for investigating how the oscillatory localization of TFP (dependent  
273 on nutrient conditions) of *Pseudomonas aeruginosa* and *Myxococcus xanthus* would interfere  
274 with fluid flows<sup>17</sup>.

275

## 276 Methodology

277 We have implemented twitching dynamics of bacteria into the existing CFD-DEM platform  
278 called SediFOAM<sup>34</sup>, which couples the molecular dynamic code LAMMPS<sup>43</sup> and the well-  
279 established CFD package, OpenFOAM<sup>44</sup>. The present work is an extension for the authors'  
280 Individual-based model of microbial communities implemented on LAMMPS<sup>45</sup>. SediFOAM  
281 has been primarily used to simulate particle sedimentation in fluid. In the present work, we  
282 extend SediFOAM to model rod-shaped bacteria twitching in fluid flows. The model  
283 components are explained below.

284

### 285 Discrete element modelling (DEM) of bacteria and surface

286 We model bacteria and solid substratum (flat and groove surfaces) by using spherical particles.  
287 Rod-shape bacteria are modelled as a rigid assemble of several spherical particles (See Figure  
288 1). The total force on the rigid body is computed as the sum of the forces on its constituent  
289 particles. This idea has been employed before for modelling rod-shaped bacteria<sup>33</sup>. The  
290 translational and rotational movement of the rigid body is calculated based on Newton's second  
291 law as

$$292 \quad m_b \frac{d\vec{u}_b}{dt} = \vec{f}_{c,b} + \vec{f}_{fp,b} + \vec{f}_{p,b} + m_b \vec{g} \quad , \quad (3)$$

$$293 \quad I_b \frac{d\vec{\theta}_b}{dt} = \vec{T}_{c,b} + \vec{T}_{fp,b} + \vec{T}_{p,b}. \quad (4)$$

294

295 Here  $m_b$  and  $I_b$  are the mass and moment of inertia of the bacterium (rigid body), respectively.  
296 Eq (3) describes the translational velocity  $\vec{u}_b$  of the bacterium, and the four terms on the right  
297 hand side represent respectively the contact, fluid interaction, TFP pili, and gravitational forces  
298 acting on the cell. The rotational movement of the cell body  $\vec{\theta}_b$  is calculated based on the torque  
299 produced by contact forces ( $\vec{T}_c$ ), fluid interaction forces ( $\vec{T}_{fp}$ ) and pili forces ( $\vec{T}_p$ ). The contact  
300 forces are calculated based on Hook's law depending on the overlap distance between  
301 interacting particles. Fluid interaction and pili forces are further explained below.

302

### 303 **Computational fluid dynamics (CFD)**

304 The fluid is assumed Newtonian and its flow is described by the locally-average Navier-Stokes  
305 equation as

$$306 \quad \nabla \cdot (\varepsilon_s \vec{U}_s + \varepsilon_f \vec{U}_f) = 0, \quad (5)$$

307

$$308 \quad \frac{\partial(\varepsilon_f \vec{U}_f)}{\partial t} + \nabla \cdot (\varepsilon_f \vec{U}_f \vec{U}_f) = \frac{1}{\rho_f} (-\nabla p + \varepsilon_f \mu \nabla^2 \vec{U} + \varepsilon_f \rho_f \vec{g}) + \vec{F}_{fp}, \quad (6)$$

309

310 where  $\varepsilon_s$  is the solid volume fraction and  $\varepsilon_f = 1 - \varepsilon_s$  is the fluid volume fraction. The fluid  
311 density  $\rho_f$  and its viscosity  $\mu$  are assumed as constants. Here  $\vec{U}_s$  and  $\vec{U}_f$  are the velocity of the  
312 solid and fluid phases, respectively. The gravity  $\vec{g}$  is also included because fluid and bacterial  
313 density would be different and hence buoyancy forces would be important. The last term  $\vec{F}_{fp}$   
314 represents fluid-solid interaction forces, which are drag, lift, added mass, and lubrication forces  
315 as detailed in the SediFOAM documentation [34](#) and not repeated here. The Eulerian fields  $\varepsilon_s$ ,  
316  $\vec{U}_s$  and  $\vec{F}_{fp}$  are calculated by averaging the information of Lagrangian particles.

317

### 318 **Twitching model**

319 The TFP are modelled as dynamic springs emanating from one pole of the bacterium and these  
320 springs can elongate, retract, attach and detach from the surface (Figure 1). Each pilus operates  
321 independently from the others. When a new pilus is born at the bacterial pole, its angular  
322 direction from the bacterial axis is randomly decided according to a Normal distribution with  
323 standard angular deviation of  $\alpha$ ,  $N(0, \alpha^2)$ . After the pilus elongates at constant velocity  $v_e$  to a  
324 maximum length  $L_{max}$ , it will attach to the surface with probability  $p_a$  and then it immediately  
325 starts to retract at a variable retraction velocity. A bound retracting pilus can detach (or break)  
326 with probability  $p_b$ . Each un-attached or broken pilus retracts at velocity  $v_r$  to the pole until it

327 disappears and then a new pilus is born at the same pole at a random direction chosen from the  
328 Normal distribution. The total numbers of pili remain constant at any given time.

329 The pulling force of each pilus is modelled by assuming a linear spring with variable  
330 equilibrium length as

331

$$332 \quad f_p(t) = k_p(L(t) - L_{eq}(t)), \quad (7)$$

333 where  $L(t)$  and  $L_{eq}(t)$  are the total length and equilibrium lengths of the pilus, respectively.

334 The total length is simply the distance between the bacterial pole and the pilus tip. If the pilus  
335 is unbounded the equilibrium length is equal to the total length, which means the pulling force  
336 is zero. Once the pilus attaches to a surface the equilibrium length decreases representing pili  
337 retraction. As the retraction velocity of bounded pili depends on the pulling force [7](#), the  
338 equilibrium length is decreased as

339

$$340 \quad L_{eq}(t) = L_{max}(1 - v_r \left( \frac{f_p(t)}{f_{stall}} \right) t), \quad (8)$$

341

342 where  $f_{stall}$  is the maximum pulling force which can be produced by each pilus. A bounded  
343 pilus will break in a time interval  $\Delta t$  with probability  $p_b = \Delta t \frac{1}{\tau} e^{-\frac{f_p(t)}{f_{stall}}}$  [11](#) where  $\tau$  is the  
344 characteristic time of pili detachment.

345

### 346 **Scaling-up**

347 The time scale for twitching is much larger than 1s [2,8](#) and the time scale for fluid flow is much  
348 smaller than 1s. Therefore, twitching dynamics and fluid flow occur at two different time scales  
349 and hence it is needed to separate these time scales for the model. The CFD-DEM is run until  
350 quasi-steady state and the steady state flow field is calculated for a given bacterial position and  
351 orientation (Eqs. 3-6). Then, the bacterial twitching dynamics is calculated with a larger time  
352 step (Eqs. 7-8) and the position and orientation of the bacterium are updated using the velocities  
353 calculated from the CFD-DEM. Pili detachment and attachment events are also updated during  
354 this step. Next, the flow field is updated according to the new cell position and orientation  
355 through CFD-DEM calculations and so on. Therefore, three different time steps are involved  
356 in this model: the smallest time step of  $10^{-9}$  s for DEM (Eqs. 3-4), an intermediate time step of  
357  $10^{-5}$  s for CFD, and the largest time step of 0.1s for pili dynamics (elongation, retraction,  
358 attachment, detachment) and scaling-up.

## 359 Implementation in SediFoam

360 We have implemented our rod-shape bacterial model in SediFoam, in particular, in its  
361 LAMMPS module. Rod-shaped bacteria are created by assembling spherical particles rigidly  
362 by using the constraint *fix rigid* command provided by LAMMPS. Pili emanate from one pole  
363 of the bacterium. The *fix spring* command of LAMMPS is modified to model dynamic springs  
364 for TFP. Rough and irregular substratum is created using spherical stationary particles using  
365 the *fix move* command of LAMMPS (see the LAMMPS documentation at  
366 <http://lammps.sandia.gov>). Then, DEM is resolved by using the Verlet algorithm in LAMMPS;  
367 the PISO algorithm is used for solving CFD in OpenFOAM; and SediFOAM acts as an  
368 interface to transfer and map the properties of the Eulerian mesh and Lagrangian particles  
369 between the two modules.

370

## 371 Data Availability

372 The datasets generated and analysed during the current study are available from the  
373 corresponding authors on request.

## 374 References

375

- 376 1 O'Toole, G. A. & Wong, G. C. L. Sensational biofilms: surface sensing in bacteria. *Current*  
377 *Opinion in Microbiology* **30**, 139-146, doi:10.1016/j.mib.2016.02.004 (2016).
- 378 2 Maier, B. & Wong, G. C. L. How Bacteria Use Type IV Pili Machinery on Surfaces. *Trends*  
379 *Microbiol* **23**, 775-788, doi:10.1016/j.tim.2015.09.002 (2015).
- 380 3 Jin, F., Conrad, J. C., Gibiansky, M. L. & Wong, G. C. L. Bacteria use type-IV pili to  
381 slingshot on surfaces. *P Natl Acad Sci USA* **108**, 12617-12622, doi:10.1073/pnas.1105073108  
382 (2011).
- 383 4 Brill-Karniely, Y., Jin, F., Wong, G. C. L., Frenkel, D. & Dobnikar, J. Emergence of complex  
384 behavior in pili-based motility in early stages of P-aeruginosa surface adaptation. *Sci Rep-Uk*  
385 **7**, doi:ARTN 45467 10.1038/srep45467 (2017).
- 386 5 Semmler, A. B. T., Whitchurch, C. B. & Mattick, J. S. A re-examination of twitching motility  
387 in *Pseudomonas aeruginosa*. *Microbiol-Sgm* **145**, 2863-2873, doi:Doi 10.1099/00221287-145-  
388 10-2863 (1999).
- 389 6 de Haan, H. W. Modeling and Simulating the Dynamics of Type IV Pili Extension of  
390 *Pseudomonas aeruginosa*. *Biophys J* **111**, 2263-2273, doi:10.1016/j.bpj.2016.09.050 (2016).
- 391 7 Maier, B. The bacterial type IV pilus system - a tunable molecular motor. *Soft Matter* **9**,  
392 5667-5671, doi:10.1039/c3sm50546d (2013).
- 393 8 Skerker, J. M. & Berg, H. C. Direct observation of extension and retraction of type IV pili. *P*  
394 *Natl Acad Sci USA* **98**, 6901-6904, doi:DOI 10.1073/pnas.121171698 (2001).
- 395 9 Maier, B., Potter, L., So, M., Seifert, H. S. & Sheetz, M. P. Single pilus motor forces exceed  
396 100 pN. *P Natl Acad Sci USA* **99**, 16012-16017, doi:10.1073/pnas.242523299 (2002).
- 397 10 Biais, N., Ladoux, B., Higashi, D., So, M. & Sheetz, M. Cooperative retraction of bundled  
398 type IV pili enables nanonewton force generation. *Plos Biol* **6**, 907-913, doi:ARTN e87  
399 10.1371/journal.pbio.0060087 (2008).
- 400 11 Ponisch, W., Weber, C. A., Juckeland, G., Biais, N. & Zaburdaev, V. Multiscale modeling of  
401 bacterial colonies: how pili mediate the dynamics of single cells and cellular aggregates. *New*  
402 *J Phys* **19**, doi:ARTN 01500310.1088/1367-2630/aa5483 (2017).

- 403 12 Dewenter, L. *et al.* Differential Interaction Forces Govern Bacterial Sorting and Stability in  
404 Early Biofilms. *Biophys J* **110**, 469a-469a, doi:DOI 10.1016/j.bpj.2015.11.2513 (2016).
- 405 13 Ellison, C. K. *et al.* Obstruction of pilus retraction stimulates bacterial surface sensing.  
406 *Science* **358**, 535-538, doi:10.1126/science.aan5706 (2017).
- 407 14 Persat, A., Inclan, Y. F., Engel, J. N., Stone, H. A. & Gitai, Z. Type IV pili  
408 mechanochemically regulate virulence factors in *Pseudomonas aeruginosa*. *P Natl Acad Sci*  
409 *USA* **112**, 7563-7568, doi:10.1073/pnas.1502025112 (2015).
- 410 15 Ellison, C. K. *et al.* Retraction of DNA-bound type IV competence pili initiates DNA uptake  
411 during natural transformation in *Vibrio cholerae*. *Nat Microbiol* **3**, 773+,  
412 doi:10.1038/s41564-018-0174-y (2018).
- 413 16 Mattingly, A. E., Weaver, A. A., Dimkovikj, A. & Shrout, J. D. Assessing Travel Conditions:  
414 Environmental and Host Influences on Bacterial Surface Motility. *J Bacteriol* **200**, doi:ARTN  
415 e00014- 1810.1128/JB.00014-18 (2018).
- 416 17 Ni, L. *et al.* Bacteria differently deploy type-IV pili on surfaces to adapt to nutrient  
417 availability. *Npj Biofilms and Microbiomes* **2**, doi:UNSP 15029  
418 10.1038/npjbiofilms.2015.29 (2016).
- 419 18 Gelimson, A. *et al.* Multicellular Self-Organization of *P. aeruginosa* due to Interactions with  
420 Secreted Trails. *Phys Rev Lett* **117**, doi:ARTN 178102  
421 10.1103/PhysRevLett.117.178102 (2016).
- 422 19 Zaburdaev, V. *et al.* Uncovering the Mechanism of Trapping and Cell Orientation during  
423 *Neisseria gonorrhoeae* Twitching Motility. *Biophys J* **107**, 1523-1531,  
424 doi:10.1016/j.bpj.2014.07.061 (2014).
- 425 20 Marathe, R. *et al.* Bacterial twitching motility is coordinated by a two-dimensional tug-of-war  
426 with directional memory. *Nat Commun* **5**, doi:ARTN 3759  
427 10.1038/ncomms4759 (2014).
- 428 21 Ribbe, J., Baker, A. E., Euler, S., O'Toole, G. A. & Maier, B. Role of Cyclic Di-GMP and  
429 Exopolysaccharide in Type IV Pilus Dynamics. *J Bacteriol* **199**, doi:UNSP e00859-16  
430 10.1128/JB.00859-16 (2017).
- 431 22 Chang, Y. R., Weeks, E. R. & Ducker, W. A. Surface Topography Hinders Bacterial Surface  
432 Motility. *Acs Applied Materials & Interfaces* **10**, 9225-9234, doi:10.1021/acsami.7b16715  
433 (2018).
- 434 23 Meel, C., Kouzel, N., Oldewurtel, E. R. & Maier, B. Three-Dimensional Obstacles for  
435 Bacterial Surface Motility. *Small* **8**, 530-534, doi:10.1002/sml.201101362 (2012).
- 436 24 Kurre, R. & Maier, B. Oxygen Depletion Triggers Switching between Discrete Speed Modes  
437 of Gonococcal Type IV Pili. *Biophys J* **102**, 2556-2563, doi:10.1016/j.bpj.2012.04.020  
438 (2012).
- 439 25 Siryaporn, A., Kim, M. K., Shen, Y., Stone, H. A. & Gitai, Z. Colonization, Competition, and  
440 Dispersal of Pathogens in Fluid Flow Networks. *Current Biology* **25**, 1201-1207,  
441 doi:10.1016/j.cub.2015.02.074 (2015).
- 442 26 Shen, Y., Siryaporn, A., Lecuyer, S., Gitai, Z. & Stone, H. A. Flow Directs Surface-Attached  
443 Bacteria to Twitch Upstream. *Biophys J* **103**, 146-151, doi:10.1016/j.bpj.2012.05.045 (2012).
- 444 27 Meng, Y. Z. *et al.* Upstream migration of *Xylella fastidiosa* via pilus-driven twitching  
445 motility. *J Bacteriol* **187**, 5560-5567, doi:10.1128/Jb.187.16.5560-5567.2005 (2005).
- 446 28 Tala, L. F., A.; Kukura, P.; Persat, A. LABEL-FREE VISUALIZATION OF TYPE IV PILI  
447 DYNAMICS BY INTERFEROMETRIC SCATTERING MICROSCOPY. *bioRxiv*,  
448 doi:<http://dx.doi.org/10.1101/298562> (2018).
- 449 29 Ryota Morikawa, M. T., Takeshi Miyakawa and Masako Takasu. in *12th Asia Pacific Physics*  
450 *Conference (APPC12)*.
- 451 30 Rusconi, R., Guasto, J. S. & Stocker, R. Bacterial transport suppressed by fluid shear. *Nat*  
452 *Phys* **10**, 212-217, doi:10.1038/Nphys2883 (2014).
- 453 31 Warning, A. D. & Datta, A. K. Mechanistic understanding of non-spherical bacterial  
454 attachment and deposition on plant surface structures. *Chem Eng Sci* **160**, 396-418,  
455 doi:10.1016/j.ces.2016.11.030 (2017).



- 456 32 Kim, M. C. & Klapperich, C. A new method for simulating the motion of individual  
457 ellipsoidal bacteria in microfluidic devices. *Lab on a Chip* **10**, 2464-2471,  
458 doi:10.1039/c003627g (2010).
- 459 33 Kim, M. C. *et al.* Programmed trapping of individual bacteria using micrometre-size sieves.  
460 *Lab Chip* **11**, 1089-1095, doi:10.1039/c0lc00362j (2011).
- 461 34 Sun, R. & Xiao, H. SediFoam: A general-purpose, open-source CFD-DEM solver for particle-  
462 laden flow with emphasis on sediment transport. *Comput Geosci-Uk* **89**, 207-219,  
463 doi:10.1016/j.cageo.2016.01.011 (2016).
- 464 35 Xiao, H. & Sun, J. Algorithms in a Robust Hybrid CFD-DEM Solver for Particle-Laden  
465 Flows. *Commun Comput Phys* **9**, 297-323, doi:10.4208/cicp.260509.230210a (2011).
- 466 36 Sun, R. & Xiao, H. CFD-DEM simulations of current-induced dune formation and  
467 morphological evolution. *Adv Water Resour* **92**, 228-239,  
468 doi:10.1016/j.advwatres.2016.03.018 (2016).
- 469 37 Jeffery, G. B. F., N. G. The motion of ellipsoidal particles immersed in a viscous fluid.  
470 *Proceedings of the Royal Society of London Series A* **102 (715)**, 161-179 (1922).
- 471 38 Gibiansky, M. L. *et al.* Bacteria Use Type IV Pili to Walk Upright and Detach from Surfaces.  
472 *Science* **330**, 197-U150, doi:10.1126/science.1194238 (2010).
- 473 39 Conrad, J. C. *et al.* Flagella and pili-mediated near-surface single-cell motility mechanisms in  
474 *P. aeruginosa*. *Biophys J* **100**, 1608-1616, doi:10.1016/j.bpj.2011.02.020 (2011).
- 475 40 Gu, H. *et al.* How Escherichia coli lands and forms cell clusters on a surface: a new role of  
476 surface topography. *Sci Rep-Uk* **6**, doi:ARTN 29516  
477 10.1038/srep29516 (2016).
- 478 41 Lushi, E., Wioland, H. & Goldstein, R. E. Fluid flows created by swimming bacteria drive  
479 self-organization in confined suspensions. *P Natl Acad Sci USA* **111**, 9733-9738,  
480 doi:10.1073/pnas.1405698111 (2014).
- 481 42 Persat, A., Stone, H. A. & Gitai, Z. The curved shape of *Caulobacter crescentus* enhances  
482 surface colonization in flow. *Nat Commun* **5**, doi:ARTN 3824  
483 10.1038/ncomms4824 (2014).
- 484 43 Plimpton, S. Fast Parallel Algorithms for Short-Range Molecular-Dynamics. *J Comput Phys*  
485 **117**, 1-19, doi:DOI 10.1006/jcph.1995.1039 (1995).
- 486 44 Weller, H. G., Tabor, G., Jasak, H. & Fureby, C. A tensorial approach to computational  
487 continuum mechanics using object-oriented techniques. *Computers in Physics* **12**, 620-631,  
488 doi:Doi 10.1063/1.168744 (1998).
- 489 45 Jayathilake, P.G., Gupta, P., Li, B., Madsen, C., Oyebamiji, O., González-Cabaleiro, R.,  
490 Rushton, S., Bridgens, B., Swailes, D., Allen, B., McGough, A.S., Zuliani, P., Ofiteru, I.D.,  
491 Wilkinson, D., Chen, J., Curtis, T. A mechanistic Individual-based Model of microbial  
492 communities. *PLoS ONE* **12(8)**, e0181965, <https://doi.org/10.1371/journal.pone.0181965>  
493 (2017).

494  
495

## 496 **Acknowledgement**

497 The authors would like to thank the UK Engineering and Physical Sciences Research Council  
498 (EPSRC) for funding this work as part of the Newcastle University Frontiers in Engineering  
499 Biology (NUFEB) project (EP/K039083/1). This work would not have been possible without  
500 the multi-disciplinary collaboration enabled by this award.

501

## 502 **Author Contributions**

503 All authors contributed to this work. PGJ, BL and JC designed the research. PGJ and BL  
504 developed the code. PGJ performed all the simulations and produced the data. PGJ and JC did



505 data analysis and prepared the original draft. BL, PZ and TC reviewed and edited the  
506 manuscript. All authors have given approval to the final version of the manuscript.

507

## 508 **Additional Information**

509 **Competing interests:** The authors declare no competing financial and non-financial interests.

## Figures

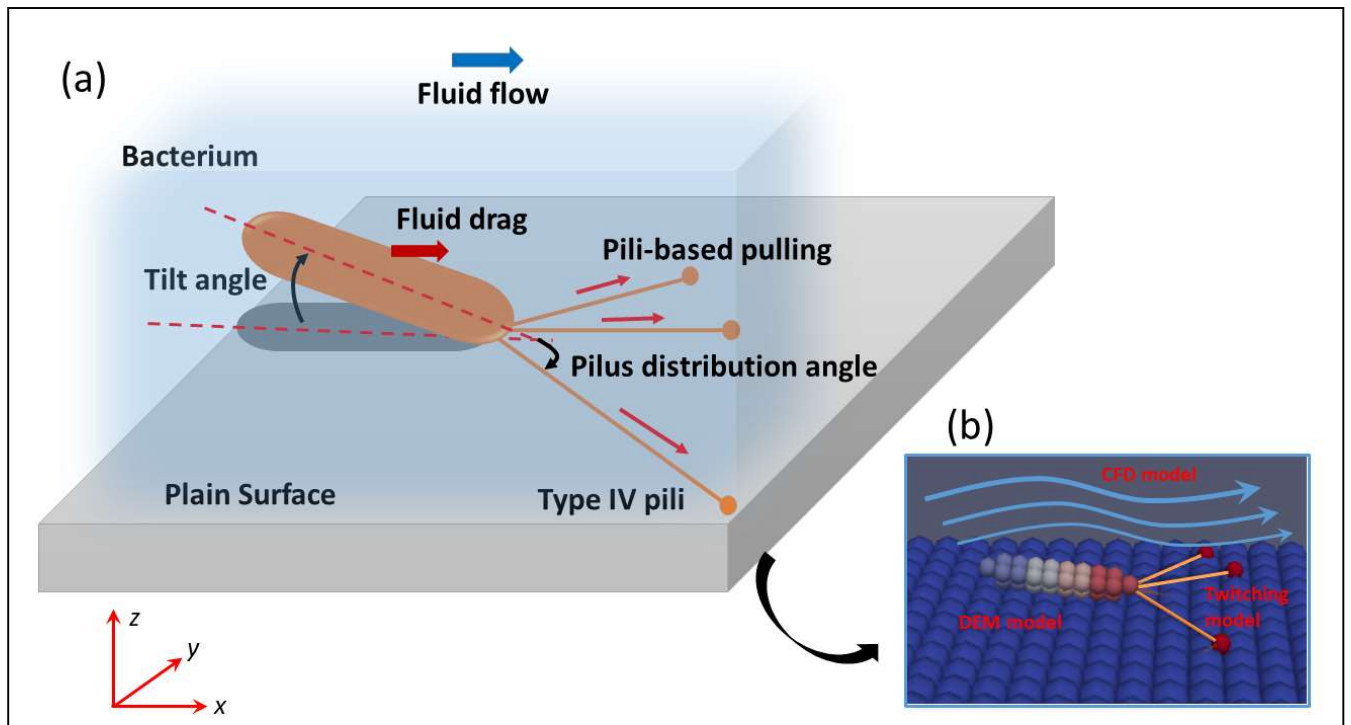

**Figure 1.** (a) Schematic of bacterial twitching; (b) CFD-DEM model. The rod-shaped bacteria are modelled as a group of spherical particles rigidly assembled together. The pili are emanated from the bacterial pole coloured in red. Each pilus is modelled as a dynamic spring which can elongate, attach, retract and detach from the surface.

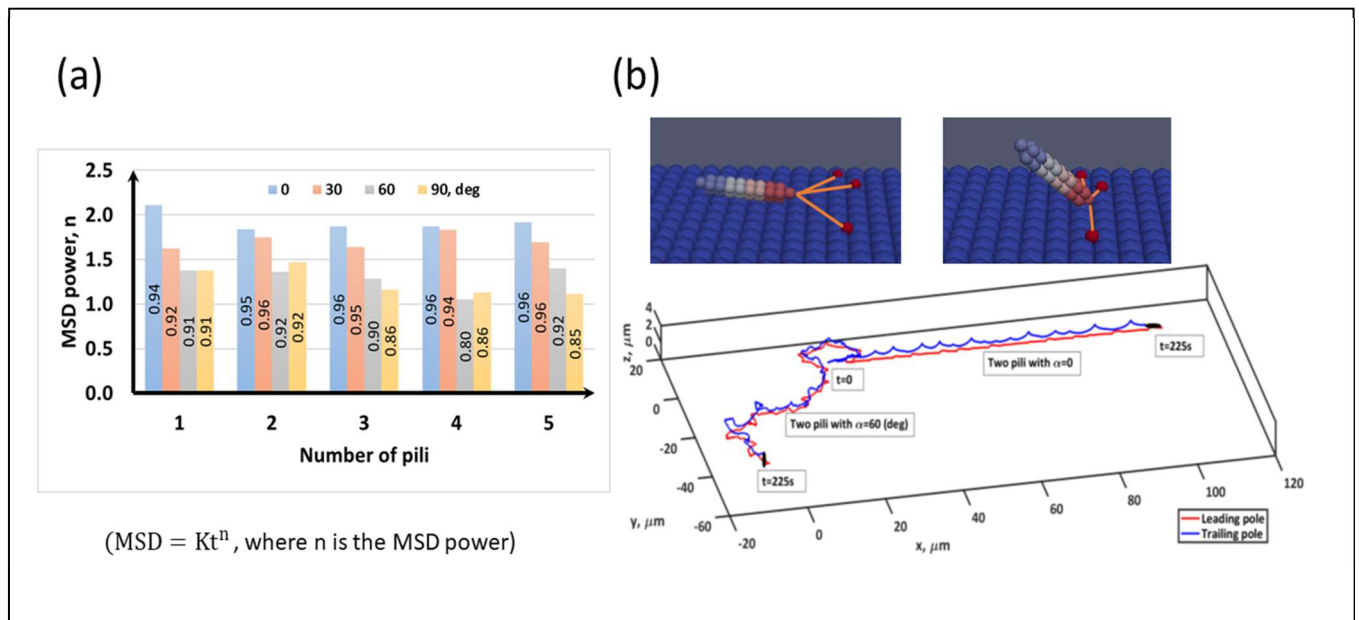

**Figure 2.** (a) MSD power for different pili angles and pili numbers ( $MSD = Kt^n$ , where  $n$  is the MSD power,  $K$  is a constant, and  $t$  is the time); (b) When the bacterium is pulled by the pili for an extended period of time, the bacterium gradually gets inclined to the surface and if the period is long enough the bacterium would reach to a vertical orientation. The trajectory of the leading and trailing poles are shown for pili number is 2 and the pili angle is 30 deg.

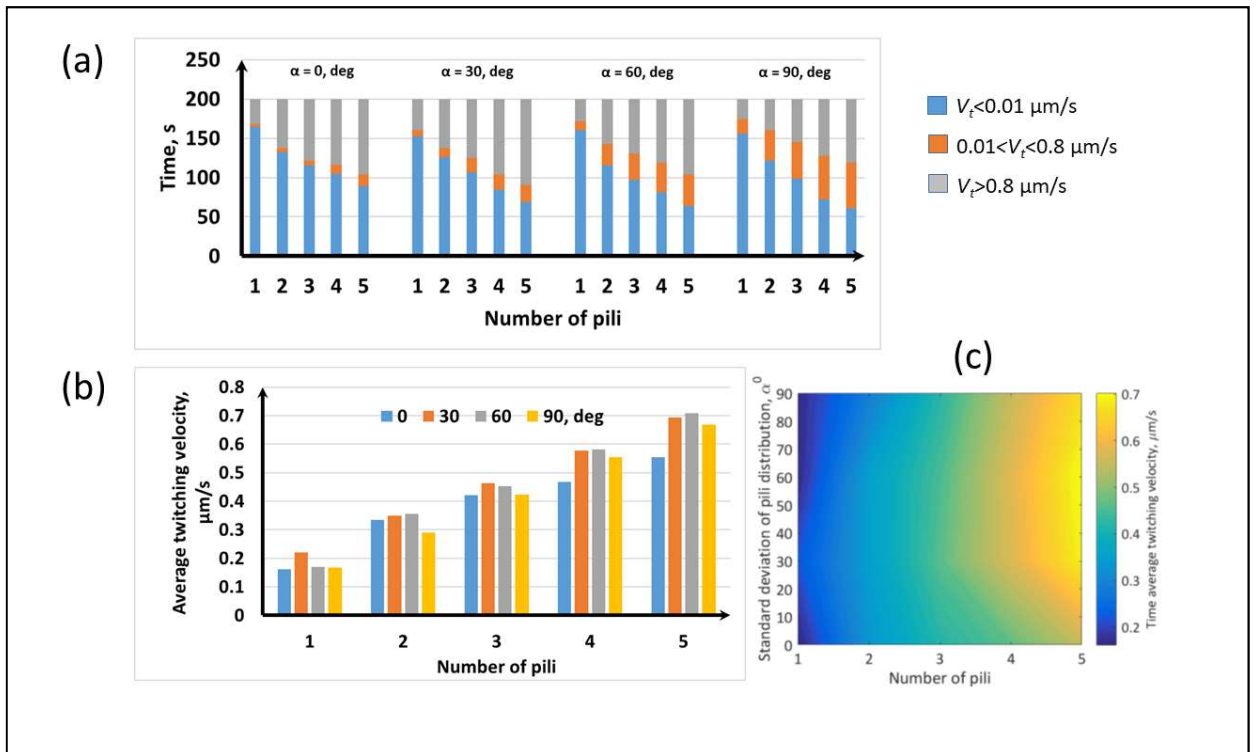

**Figure 3.** (a) Twitching velocity for different pili distribution angles and pili numbers. As expected, the stationary time ( $V_t < 0.01 \mu\text{m/s}$ ) decreases and moving time ( $V_t > 0.8 \mu\text{m/s}$ ) increases as the number of pili increases because the bacterium is pulled by pili more frequently then. Pili distribution angle has significant influence on the intermediate velocity ( $0.01 < V_t < 0.8 \mu\text{m/s}$ ); (b-c) The average twitching velocity is more sensitive to the number of pili than the pili distribution angle.

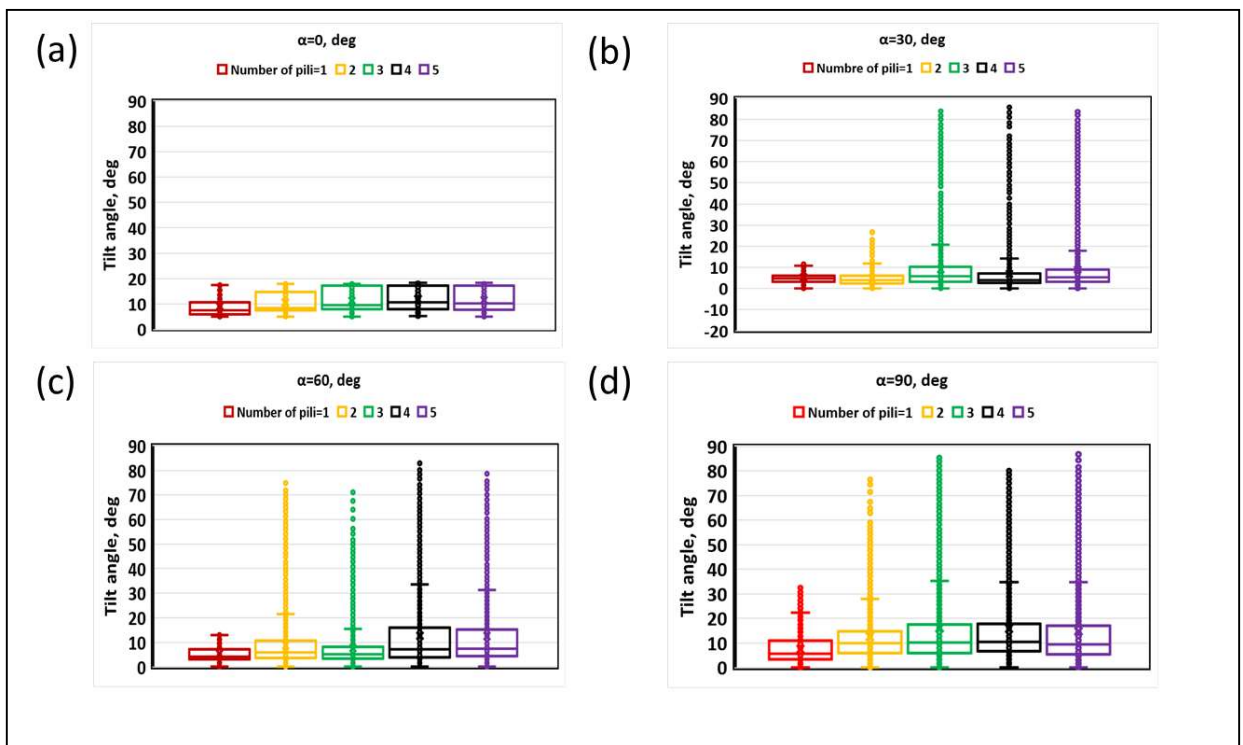

**Figure 4.** Tilt angle for different pili distribution angles and pili numbers: (a) 0; (b) 30; (c) 60; (d) 90 degrees. Larger the number of pili the tilt angle distributes in a wide range while the average tilt angle is around 5-10 degrees. When the pili distribution angle and the number of pili larger we can see that the bacterium sometimes orients vertically. 17

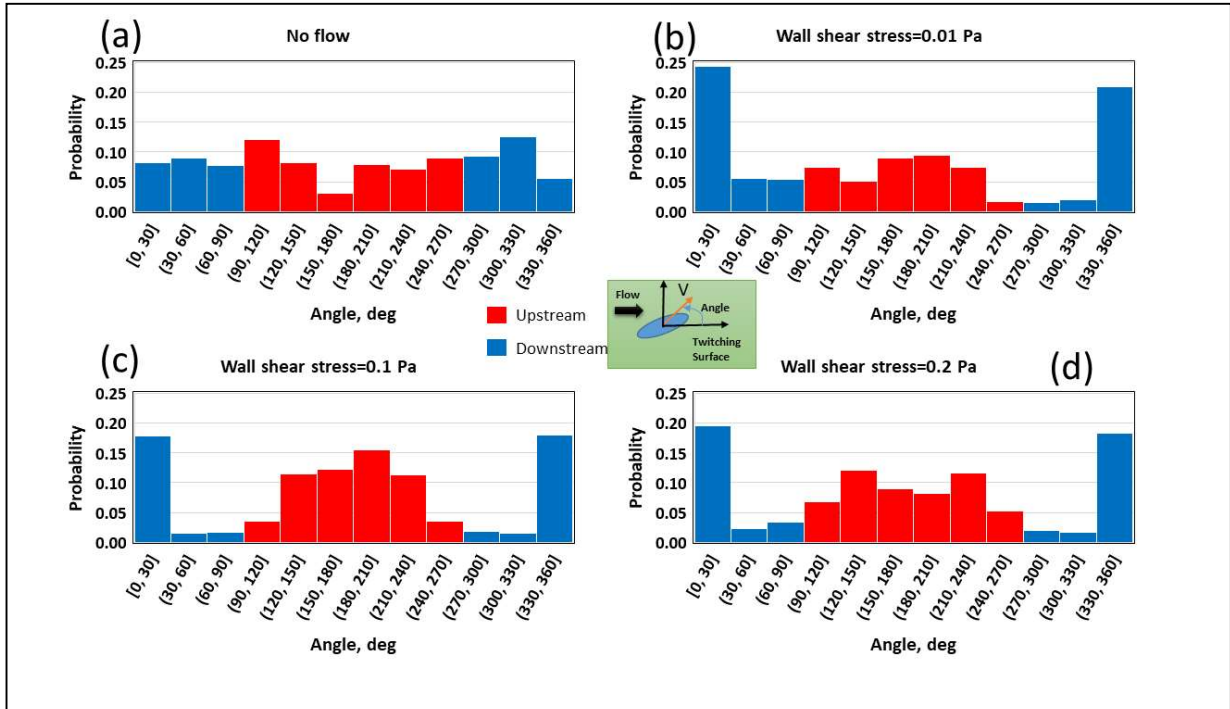

**Figure 5.** (a) Probability of the direction of motion of the cell is shown as a function of wall shear stress. If the fluid does not flow, the cell can twitch any direction on the surface (the probability of each angular bin is around  $1/12=0.08$ ); (b-d) As the fluid flow (or wall shear stress) increases, the cell tends to move upstream, the probability of bins from 90 to 270 degrees increases.

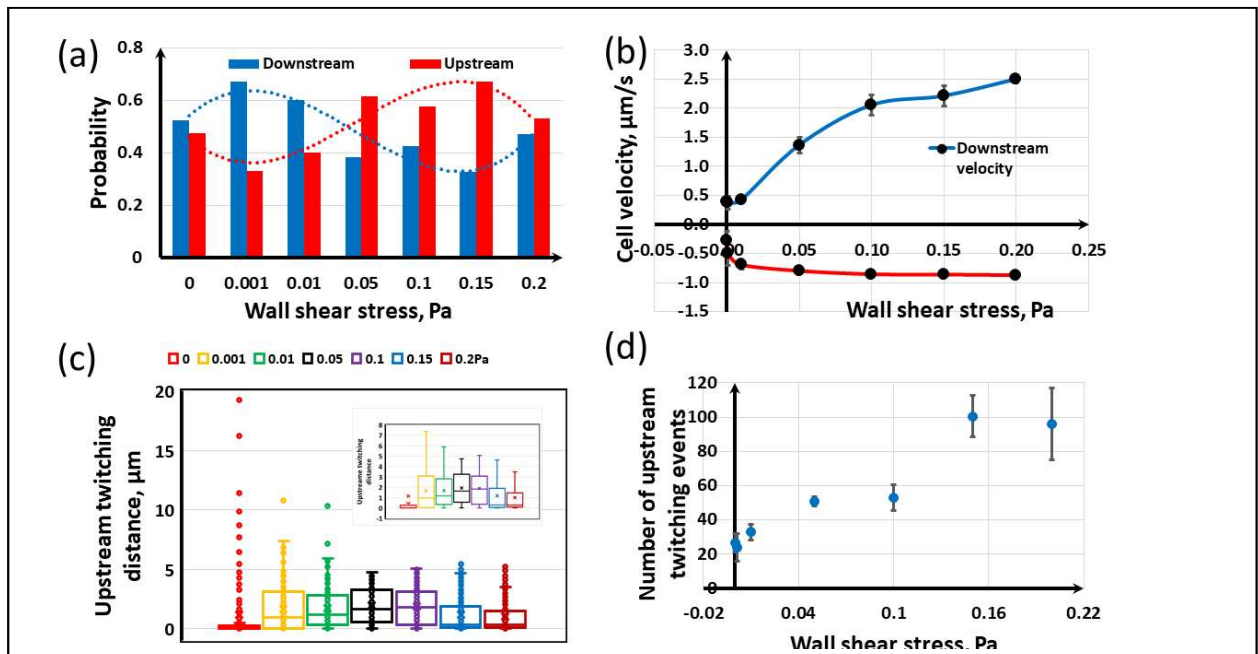

**Figure 6.** (a) As the fluid flow increases, the probability of upstream twitching (Red bars) decreases and reaches a minimum and then increases to a maximum and then it decreases again; (b) Time average velocity in upstream and downstream directions; (c) Upstream twitching distance; (d) Number of twitching events.

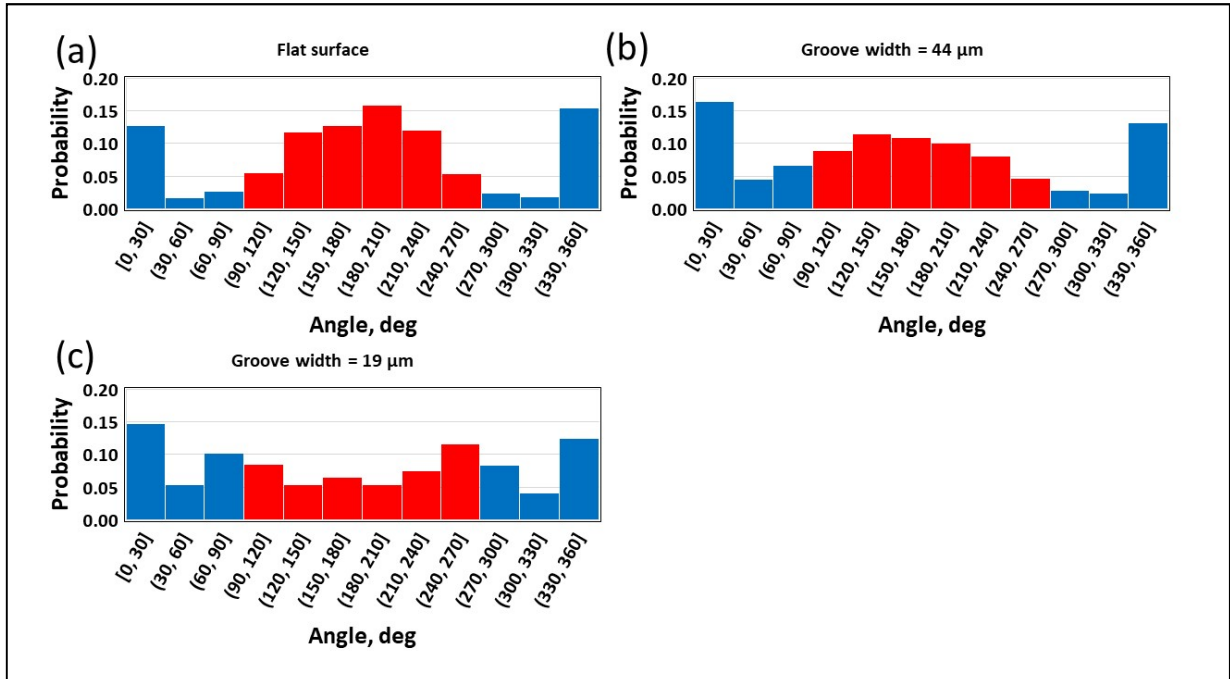

**Figure 7.** Effect of surface topography on bacterial upstream twitching at wall shear stress of 0.15 Pa: **(a)** Flat surface; **(b)** Groove width is 44  $\mu\text{m}$ ; **(c)** Groove width is 19  $\mu\text{m}$ . It is seen that the bacteria have a chaotic motion when the groove width is smaller.

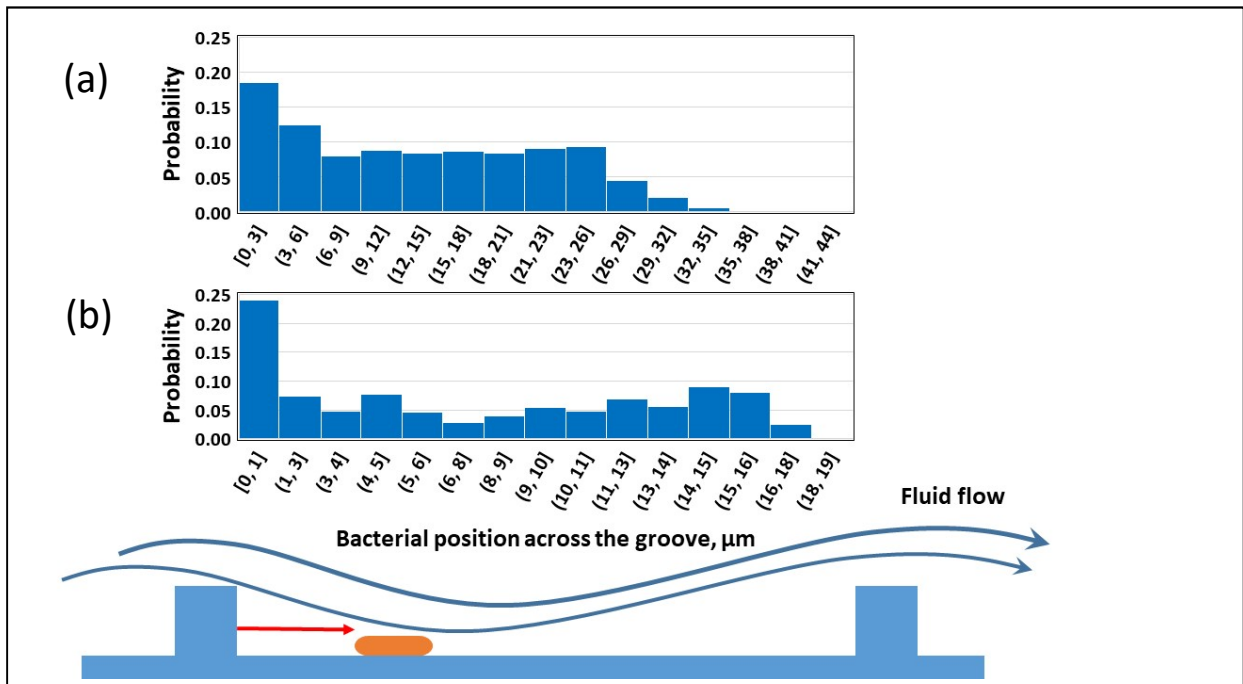

**Figure 8.** Probability of bacterial residency time at difference places inside the groove: **(a)** Groove width is 44 $\mu\text{m}$ ; **(b)** Groove width is 19 $\mu\text{m}$ . The results indicate that bacteria are likely to accumulate near downstream sides of groove walls.
